# Supplementary material
Source: PubMed Central journal article supplement (PMC126651)
Supplement: pnas_152502899_1.pdf [file pnas_152502899_1.pdf]

## Appendix

*Proof of Lemma 1:* The result follows, because  $Q$  is (i) nonempty, (ii) bounded above, and (iii) closed.

(i) Choose any  $\bar{K} > 0$ . If  $s(t) = F(\bar{K}, t, \alpha) / 2$ , for  $t = 1, \dots, T$ , then  $p(t) > 0$ , for all  $t = 0, \dots, T$ , and, whereas  $y(0) < 0$ ,  $y(t) > 0$ , for  $t = 1, \dots, T$ . If  $r \in (-\infty, \infty)$  is sufficiently small, it follows that  $\sum_{t=0}^T p(t)y(t)e^{-rt} \geq 0$ , so that  $r \in Q$ .

(ii) The assumptions on  $C$  and  $F$  in the first two paragraphs of *The Setup* imply that there exist constants  $B > 0$  and  $C > 0$  such that  $C(K) \geq BK + C$ , for all  $K \geq 0$ , and a function  $A(t) > 0$  such that  $F(K, t, \alpha) \leq A(t)K$  for all  $K \geq 0$ ,  $\alpha \in A$ , and  $t = 1, \dots, T$ . Consider any  $r \in Q$ , so that

$\sum_{t=0}^T p(t)y(t)e^{-rt} \geq 0$ , for some  $(p, y) = (p(s), y(K, s)) \in M$ . Because  $p(t) \leq 1$  and

$y(t) = F(K, t, \alpha) - s(t) \leq A(t)K$ , for  $t = 1, \dots, T$ , it follows that  $K \left( -B + \sum_{t=1}^T A(t)e^{-rt} \right) - C \geq 0$ .

Hence  $r < \bar{r}$  where  $\bar{r}$  is the unique solution of  $-B + \sum_{t=1}^T A(t)e^{-\bar{r}t} = 0$ , and  $\bar{r}$  is an upper bound for  $Q$ , as required.

(iii) Consider any sequence  $r_n \rightarrow \bar{r}$  where  $r_n \in Q$  for all  $n$ . It must be shown that  $\bar{r} \in Q$ .

Suppose the sequences  $K_n$  and  $s_n$  generate  $r_n$ . Take  $N$  such that  $n > N$  implies  $r_n \geq \bar{r} - \Delta$ , for

any fixed  $\Delta > 0$ . Since  $-C(K_n) + \sum_{t=1}^T F(K_n, t, \alpha)e^{-(\bar{r}-\Delta)t} \geq 0$ , there can be no subsequence of

$K_n \rightarrow \infty$ , given the conditions on  $C$  and  $F$ . Hence there is a convergent subsequence of

$K_n \rightarrow \bar{K} \in [0, \infty)$ , say. Now define  $N$  such that  $n > N$  implies  $r_n \in (\bar{r} - \Delta, \bar{r} + \Delta)$  and

$K_n \in (\bar{K} - \Delta, \bar{K} + \Delta)$ , for some  $\Delta > 0$ . Because

$-B(\bar{K} - \Delta) - C + \sum_{t=1}^T (A(t)(\bar{K} + \Delta)e^{-(\bar{r}-\Delta)t} - s_n(t)e^{-(\bar{r}+\Delta)t}) \geq 0$ , there can be no subsequence of the

$s_n(t) \rightarrow \infty$ , for any  $t = 1, \dots, T$ . Hence there is a convergent subsequence  $s_n \rightarrow \bar{s} \in [0, \infty)^T$ , say.

It follows from continuity of the functions  $p(s)$  and  $y(K, s)$  that  $\bar{K}$  and  $\bar{s}$  generate  $\bar{r}$ , so that

$\bar{r} \in Q$ , as required.

*Proof of Lemma 2:* Consider backward induction on  $t$  for the results in the first sentence. These results clearly hold at  $t = T$ . Suppose then, as the induction hypothesis, that they hold at  $t + 1$ . It follows that  $V(K, t, \alpha) \geq 0$  is continuous in  $K \geq 0$ , because  $V(K, t + 1, \alpha) \geq 0$  and  $F(K, t, \alpha) \geq 0$  are continuous, and  $V(K, t, \alpha) = \max_{s(t)} \{F(K, t, \alpha) - s(t) + e^{-r} \sigma(s(t))V(K, t + 1, \alpha)\}$ . Indeed, the implicit function theorem implies the optimal  $s(t)$  satisfying  $\sigma'(s(t))V(K, t + 1, \alpha)e^{-r} = 1$  is a continuously differentiable function of  $K > 0$ , for any  $\alpha \in A$ . Using the “envelope theorem” it follows that  $V_K(K, t, \alpha) = F_K(K, t, \alpha) + e^{-r} \sigma(s(t))V_K(K, t + 1, \alpha)$ ,  $t = 1, \dots, T - 1$ . That is, although  $s(t)$  is a function of  $K$ , this does not affect this expression because  $s(t)$  is chosen optimally. Clearly,  $V_K(K, t, \alpha) > 0$  since  $F_K(K, t, \alpha) > 0$  and  $V_K(K, t + 1, \alpha) > 0$ . Further,  $V_K(K, t, \alpha)$  can be differentiated to yield  $V_{KK}(K, t, \alpha)$  as a continuous function of  $K > 0$ , completing the induction argument.

Consider now the choice of  $K$  to maximize  $\bar{p}V(K, 1, \alpha)e^{-r} - C(K)$ . The assumptions on  $F$  and  $C$  imply that  $\bar{p}V_K(K, 1, \alpha)e^{-r} - C'(K) > 0$ , for all small enough  $K > 0$ , and that

$\bar{p}V_K(K, 1, \alpha)e^{-r} - C'(K) < 0$  for all large enough  $K$ . Hence there must exist an optimal  $K > 0$  satisfying the first- and second-order necessary conditions as stated.

*Proof of Proposition 2:* The dependence of variables on  $r$  is noted. For any  $K > 0$ , the envelope theorem implies  $V_r(K, t, \alpha, r) = -e^{-r} \sigma(s(t))V(K, t + 1, \alpha, r) + e^{-r} \sigma(s(t))V_r(K, t + 1, \alpha, r)$ ,

$t = 1, \dots, T-1$ . Since  $V_r(K, T, \alpha, r) = 0$ , it follows that  $V_r(K, t, \alpha, r) < 0$ , for  $t = 1, \dots, T-1$ .

Given  $\bar{p}V(K^*(r^*), 1, \alpha, r^*)e^{-r^*} = C(K^*(r^*))$  and  $\bar{p}V_K(K^*(r), 1, \alpha, r)e^{-r} = C'(K^*(r))$ , it

follows that  $\frac{d}{dr}(\bar{p}V(K^*(r), 1, \alpha, r)e^{-r} - C(K^*(r))) = \bar{p}V_r(K^*(r), 1, \alpha, r) < 0$ , so that

$\bar{p}V(K^*(r), 1, \alpha, r)e^{-r} < C(K^*(r))$ , for all  $r > r^*$ . That is,  $L(r^*, p^*, y^*) = 0$ , so that the growth rate  $r^*$  is feasible, but  $\max_{p, y} L(r, p, y) < 0$ , for all  $r > r^*$ , so no growth rate strictly greater than  $r^*$  is feasible.

*Proof of Lemma 3:* The optimal  $K^*$  and  $s^*$  solve the following problem

$$\max_{K, s(1), \dots, s(T-1)} \left[ -C(K) + \sum_{t=1}^T \bar{p} \left( \prod_{\tau=1}^{t-1} \sigma(s(\tau)) \right) (F(K, t, \alpha) - s(t)) e^{-r^* t} \right].$$

The dynamic programming approach in *Lemma 2* can be extended to prove that such  $K^* > 0$  and  $s^* > 0$  are continuously differentiable functions of  $r^*$  and  $\alpha$ . Because, in addition,

$$\left[ -C(K^*) + \sum_{t=1}^T \bar{p} \left( \prod_{\tau=1}^{t-1} \sigma(s^*(\tau)) \right) (F(K^*, t, \alpha) - s^*(t)) e^{-r^* t} \right] = 0,$$

the implicit function theorem then implies that the maximum growth rate,  $r^*(\alpha)$ , say, is a continuously differentiable function of  $\alpha \in A$ . However, as another example of the envelope theorem, the derivatives of  $K^*$  and  $s^*$

play no direct role here. That is,  $\frac{dr^*(\bar{\alpha})}{d\alpha} = \frac{\sum_{t=1}^T p^*(t) F_\alpha(K^*, 1, \bar{\alpha})}{\sum_{t=1}^T t p^*(t) (F(K^*, t, \bar{\alpha}) - s^*(t))} = 0$ , as required,

given also that  $\sum_{t=1}^T t p^*(t) (F(K^*, t, \bar{\alpha}) - s^*(t)) = \sum_{t=1}^T p^*(t) V(K^*, t, \bar{\alpha}) > 0$ , by *Lemma 2*.

*Proof of Theorem 1:* Note that  $r^*(\bar{\alpha}) = 0$  and  $\frac{dr^*(\bar{\alpha})}{d\alpha} = 0$  throughout. Consider first:

*Lemma A:* (i)  $V_\alpha(K, t, \bar{\alpha}) > 0$ , for all  $K > 0$ , and  $t = 2, \dots, T$ . (ii)  $V_{K\alpha}(K, 1, \bar{\alpha}) > 0$ , for all  $K > 0$ .

*Proof of Lemma A:* (i) By the envelope theorem,

$V_\alpha(K, t, \bar{\alpha}) = F_\alpha(K, t, \bar{\alpha}) + \sigma(s(t))V_\alpha(K, t+1, \bar{\alpha})$ , for all  $K > 0$ ,  $t = 1, \dots, T-1$ . Recall

that  $F_\alpha(K, t, \bar{\alpha}) < 0$ , for all  $t < \bar{t}$ , but  $F_\alpha(K, t, \bar{\alpha}) > 0$ , for all  $t \geq \bar{t}$ . Hence backwards recursion from  $T$  implies that  $V_\alpha(K, t, \bar{\alpha}) > 0$ , for  $t = \bar{t}, \dots, T$ . Moreover, if  $V_\alpha(K, t, \bar{\alpha}) \leq 0$ , for some  $t < \bar{t}$ ,

then  $V_\alpha(K, t-1, \bar{\alpha}) < 0$ . But, since  $V_\alpha(K, 1, \bar{\alpha}) = \sum_{t=1}^T p^*(t)F_\alpha(K, t, \bar{\alpha}) / \bar{p} = 0$ , it must then be that

$V_\alpha(K, t, \bar{\alpha}) > 0$ , for any  $K > 0$ , and  $t = 2, \dots, T$ .

(ii) Differentiating  $\sigma'(s(t))V(K, t+1, \alpha)e^{-r^*} = 1$  with respect to  $\alpha$ , at  $\alpha = \bar{\alpha}$ , holding

$K > 0$  constant, yields  $\frac{\partial s(t)}{\partial \alpha} = -\frac{\sigma'(s(t))V_\alpha(K, t+1, \bar{\alpha})}{\sigma''(s(t))V(K, t+1, \bar{\alpha})} > 0$ , for  $t = 1, \dots, T-1$ . The envelope

theorem implies that  $V_K(K, 1, \alpha) = \sum_{t=1}^T e^{-r^*(t-1)}\sigma(s(1))\dots\sigma(s(t-1))F_K(K, t, \alpha) > 0$ , for all  $K \geq 0$ .

Since  $F_{K\alpha}(K, t, \alpha) \geq 0$ , differentiation of  $V_K(K, 1, \alpha)$  with respect to  $\alpha$ , at  $\alpha = \bar{\alpha}$ , with  $K > 0$  constant, then yields  $V_{K\alpha}(K, 1, \bar{\alpha}) > 0$ .

Now *Lemmas 2* and *A* imply the results of *Theorem 1*:

(i) Because  $\bar{p}V_{KK}(K^*, 1, \alpha) - C''(K^*) < 0$ , it follows from differentiating

$\bar{p}V_K(K^*, 1, \alpha)e^{-r^*} = C'(K^*)$  with respect to  $\alpha$ , at  $\alpha = \bar{\alpha}$ , that

$$\frac{dK^*}{d\alpha} = \frac{\bar{p}V_{K\alpha}(K^*, 1, \bar{\alpha})}{C''(K^*) - \bar{p}V_{KK}(K^*, 1, \bar{\alpha})} > 0.$$

(ii) Differentiating  $\sigma'(s^*(t))V(K^*, t+1, \alpha)e^{-r^*} = 1$  with respect to  $\alpha$ , at  $\alpha = \bar{\alpha}$ , where  $K$  can

vary, finally yields  $\frac{ds^*(t)}{d\alpha} = -\frac{\sigma'(s^*(t))\left[V_\alpha(K^*, t+1, \bar{\alpha}) + V_K(K^*, t+1, \bar{\alpha})\frac{dK^*}{d\alpha}\right]}{\sigma''(s^*(t))V(K^*, t+1, \bar{\alpha})} > 0$ , for

$t = 1, \dots, T-1$ .
